# Supplementary material
Source: publisher figshare collection journal article supplement (https://sage.figshare.com/ndownloader/files/20066174)
Supplement: Supplementary file 1 [file 20066174]

## Sheet: Sheet1
	First Name	Last Name	Affiliation (University, US city/Country)	Department	Email
1	Ahra	Ko	Arizona State University, Tempe	Department of Psychology	ahrako@asu.edu
2	Cari M.	Pick	Arizona State University, Tempe	Department of Psychology	Cari.Pick@asu.edu
3	Jung Yul	Kwon	Arizona State University, Tempe	Department of Psychology	JungYulKwon@asu.edu
4	Michael	Barlev	Arizona State University, Tempe	Department of Psychology	mlbarlev@gmail.com
5	Jaimie Arona	Krems	Oklahoma State University, Stillwater	Department of Psychology	jaimie.krems@okstate.edu
6	Michael E. W.	Varnum	Arizona State University, Tempe	Department of Psychology	mvarnum@asu.edu
7	Rebecca	Neel	University of Toronto, Canada	Department of Psychology	neel@psych.utoronto.ca
8	Mark	Peysha	Robbins-Madanes Training		Markpeysha@gmail.com
9	Watcharaporn	Boonyasiriwat	Chulalongkorn University, Thailand	Faculty of Psychology	watch.boonya@gmail.com
10	Eduard	Brandstätter	Johannes Kepler University Linz, Austria	Department of Economic Psychology	eduard.brandstaetter@jku.at
11	Ana Carla	Crispim	Universidade de São Paulo, Brazil	Instituto de Psicologia	anacarlacrispim@gmail.com
12	Julio Eduardo	Cruz	Universidad de los Andes, Colombia	Department of Psychology	jecruz@uniandes.edu.co
13	Daniel	David	Babeş-Bolyai University, Romania	Department of Clinical Psychology and Psychotherapy	danieldavid@psychology.ro
14	Oana A.	David	Babeş-Bolyai University, Romania	Department of Clinical Psychology and Psychotherapy	oanadavid@psychology.ro
15	Renata Pereira de	Felipe	Universidade de São Paulo, Brazil	Instituto de Psicologia	redefelipe@gmail.com
16	Velichko H.	Fetvadjiev	Victoria University of Wellington, New Zealand	School of Psychology	velichko.fetvadjiev@gmail.com
17	Ronald	Fischer	Victoria University of Wellington, New Zealand, Instituto D'Or de Pesquisa e Ensino, Brazil	School of Psychology, Behavioral Neuroscience Lab	ronald.fischer@vuw.ac.nz
18	Silvia	Galdi	University of Campania Luigi Vanvitelli, Italy	Department of Psychology	silvia.galdi@unicampania.it
19	Oscar	Galindo	Universidad de los Andes, Colombia	Department of Psychology	oj.galindo10@uniandes.edu.co
20	Luis	Gomez-Jacinto	University of Malaga, Spain	Department of Social Psychology, Social Anthropology, Social Work and Social Services	jacinto@uma.es
21	Sylvie	Graf	Czech Academy of Sciences, Czech Republic	Institute of Psychology	sylvie.graf@psu.cas.cz
22	Igor	Grossmann	University of Waterloo, Canada	Department of Psychology	igrossma@uwaterloo.ca
23	Pelin	Gul	Iowa State University, Ames	Department of Psychology	pgul@iastate.edu
24	Takeshi	Hamamura	Curtin University, Australia	School of Psychology	takeshi.hamamura@curtin.edu.au
25	Shihui	Han	Peking University, China	School of Psychological and Cognitive Sciences	shihuih@gmail.com
26	Hidefumi	Hitokoto	Fukuoka University, Japan	Humanities	hitokoto@fukuoka-u.ac.jp
27	Martina	Hřebíčková	Czech Academy of Sciences, Czech Republic	Institute of Psychology	martina@psu.cas.cz
28	Jennifer Lee	Johnson	Purdue University, West Lafayette	Department of Anthropology	john1768@purdue.edu
29	Johannes A.	Karl	Victoria University of Wellington, New Zealand	School of Psychology	johannes.karl@vuw.ac.nz
30	Oksana	Malanchuk	University of Michigan, Ann Arbor	Institute for Social Research	oksana@umich.edu
31	Asuka	Murata	Hokkaido University, Japan	Graduate School of Letters	asukamurata@lynx.let.hokudai.ac.jp
32	Jinkyung	Na	Sogang University, South Korea	Department of Psychology	jinkyung@sogang.ac.kr
33	Jiaqing	O	Aberystwyth University, U.K.	Department of Psychology	jio2@aber.ac.uk
34	Muhammed	Rizwan	The Delve Pvt Ltd, Islamabad, Pakistan		muhammad29psy@yahoo.com
35	Eric	Roth	Universidad Católica Boliviana, Bolivia	Behavioral Sciences Research Institute	eroth@ucb.edu.bo
36	Sergio Antonio Salgado	Salgado	Universidad de La Frontera, Chile	Department of Administration and Economics	sergio.salgado@ufrontera.cl
37	A. Timur	Sevincer	University of Hamburg, Germany	Department of Psychology	timur.sevincer@uni-hamburg.de
38	Adrian	Stanciu	Vechta University, Germany	Institute for Gerontology	stanciu.v.adrian@gmail.com
39	Eunkook M.	Suh	Yonsei University, South Korea	Department of Psychology	esuh@yonsei.ac.kr
40	Thomas	Talhelm	University of Chicago, Chicago	Booth School of Business	Thomas.Talhelm@ChicagoBooth.edu
41	Ayse K.	Uskul	University of Kent, U.K.	School of Psychology	A.K.Uskul@kent.ac.uk
42	Irem	Uz	TOBB University of Economics and Technology, Turkey	Department of Psychology	iremuz@gmail.com
43	Danilo	Zambrano	Fundación Universitaria Konrad Lorenz, Colombia	Department of Psychology	danilo.zambranor@konradlorenz.edu.co
44	Douglas T.	Kenrick	Arizona State University, Tempe	Department of Psychology	Douglas.Kenrick@asu.edu
